# Supplementary material
Source: PubMed Central journal article supplement (PMC2859071)
Supplement: NIHMS193200-supplement-Table_1.pdf [file NIHMS193200-supplement-Table_1.pdf]

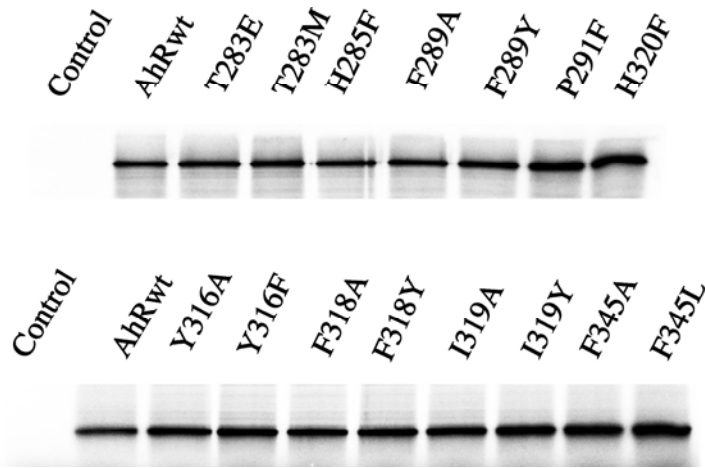

Supplemental Figure 1. Expression levels of in vitro synthesized wild-type and mutant AhRs.

<sup>35</sup>S-Labeled wild-type (wt) and mutant AhRs (specific mutation indicated) were synthesized in vitro, denatured and resolved by SDS-polyacrylamide gel electrophoresis and phosphoimager analysis of the dried gels as described in Materials and Methods.
